# Supplementary material for: N6-methyladenosine mRNA marking promotes selective translation of regulons required for human erythropoiesis
Source: PubMed Central journal article supplement (PMC6787028; doi:10.1038/s41467-019-12518-6), 2019-10-10
Supplement: 41467_2019_12518_MOESM1_ESM.pdf [file 41467_2019_12518_MOESM1_ESM.pdf]

**N<sup>6</sup>-methyladenosine mRNA marking promotes selective translation of regulons required for human erythropoiesis**

Kuppers et al.

**Supplementary Information**

# Supplementary Fig. 1

**a**

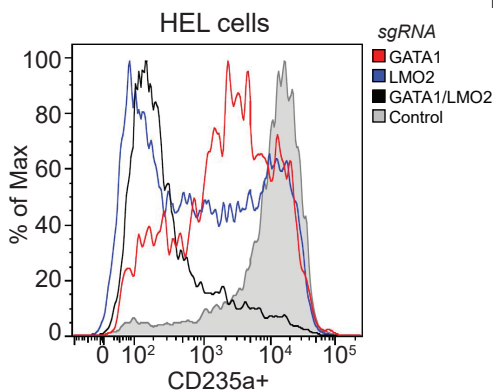

**b**

| Gene  | sgRNA |      |       |      | Gene description                                          | Log <sub>2</sub> FC vs NTC |
|-------|-------|------|-------|------|-----------------------------------------------------------|----------------------------|
|       | NTC   | GYPA | GATA1 | LMO2 |                                                           |                            |
| ALAS2 |       | *    | *     | *    | Erythroid-specific aminolevulinic acid synthase           |                            |
| EPOR  |       | *    | *     | *    | Erythropoietin Receptor                                   |                            |
| FHDC1 |       | *    | *     | *    | KLF1, GATA1, TAL1 dependent with FH2-domain               |                            |
| GYPA  | *     | *    | *     | *    | Erythroid specific determinant of MN blood group          |                            |
| HMBS  |       | *    | *     | *    | Component of the heme biosynthetic pathway                |                            |
| ITGB3 |       | *    | *     | *    | Integrin component expressed in platelets                 |                            |
| KLF1  |       | *    | *     | *    | Hematopoietic-specific transcription factor               |                            |
| MYO5B |       | *    | *     | *    |                                                           |                            |
| PKLR  |       | *    | *     | *    | Erythroid expressed pyruvate kinase                       |                            |
| PPOX  |       | *    | *     | *    | Involved in heme biosynthesis                             |                            |
| RELN  |       | *    | *     | *    | Glycoprotein involved in the regulation of erythropoiesis |                            |

RNA-seq HEL cells

**c**

## Erythroid lineage gene expression programs

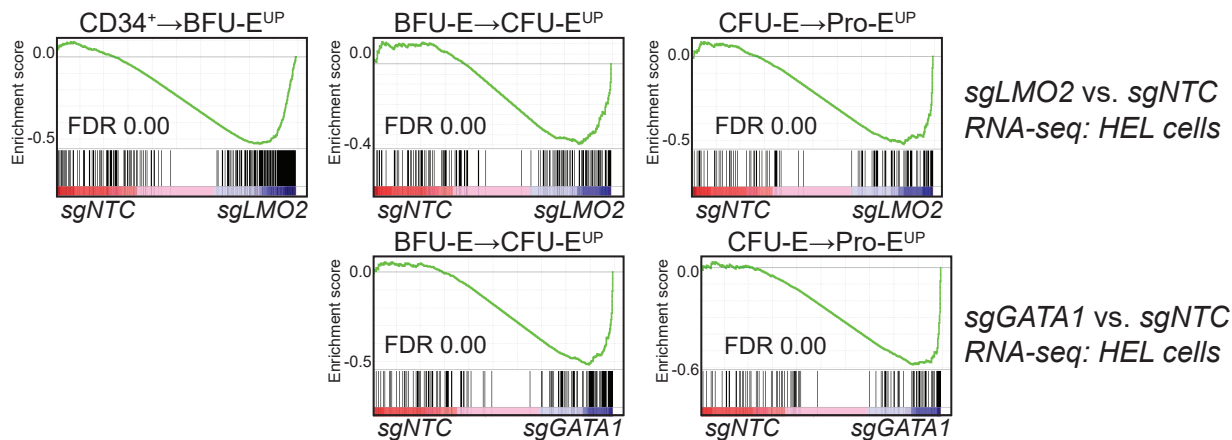

**d**

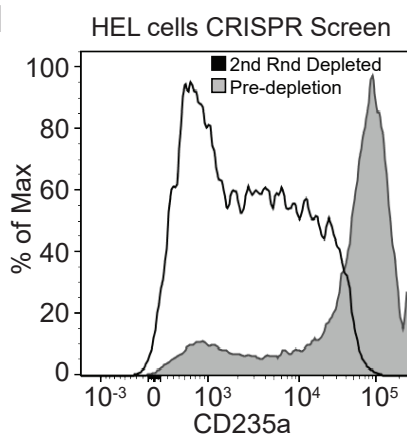

**e**

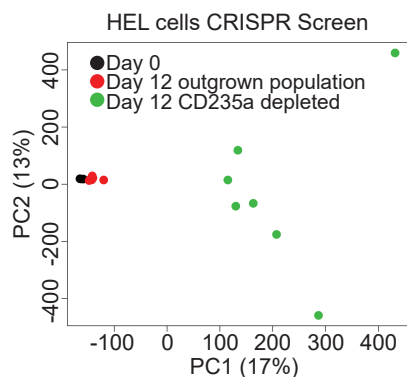

**f** Screen hit filter criteria

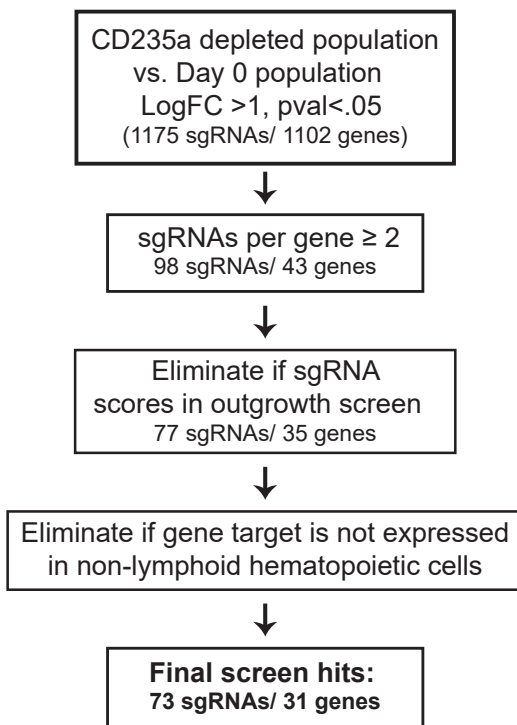

**Supplementary Fig. 1: Validation of HEL cells as a surrogate model of**

**erythropoiesis and whole genome CRISPR screening** **a**, Flow cytometry for CD235a expression in HEL cells 10 days post-transduction with lv-sgRNA-KO for *LMO2*, *GATA1* or the two combined. **b**, Gene expression changes for select GATA1 transcriptional targets (as defined by Yu et al.<sup>1</sup>) in HEL cells following *sgLMO2*-KO or *sgGATA1*-KO as quantified by RNA-seq (n=3). \*Indicates significant changes relative to non-targeting control (sgNTC) (FDR<.05). **c**, Gene expression changes in HEL cells following *GATA1*-KO or *LMO2*-KO are negatively correlated with erythroid stage-specific genes up-regulated during normal erythropoiesis by GSEA analysis (detailed in Methods). These gene sets can be found in (Supplementary Data 7). **d**, A representative example of HEL cell enrichment, on day 12 post-transduction with the whole genome CRISPR-Cas9 library, for CD235a-/low cells following two rounds of magnetic bead depletion of CD235a high cells (see Methods for details). **e**, Principal component analysis for altered sgRNA representation in the seven replicates of Day 12 post-transduction CD235a-/low HEL cells, as shown in Fig. 1a, versus all outgrown cells at Day 12 post-transduction and the Day 0 samples (Day 5 post-transduction) for the initial representation of sgRNAs within the transduced cells (n=7). **f**, The filter criteria used to define the screen hits arising in the CD235a-/low population and retested in Fig. 1b.

## Supplementary Fig. 2

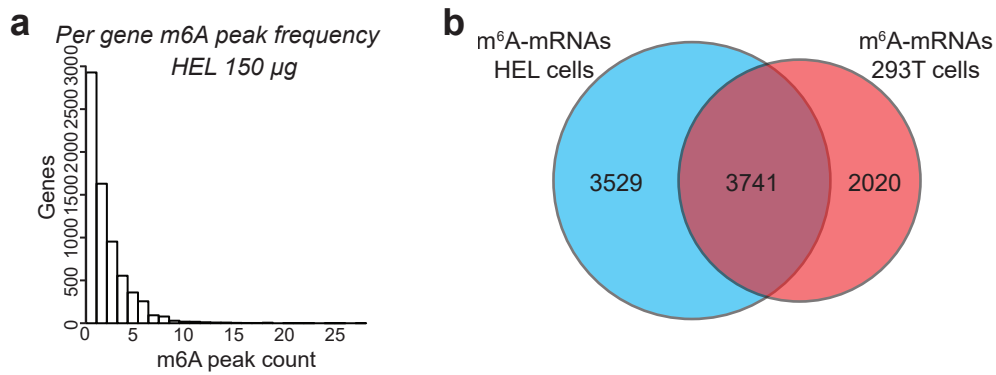

**c** Top 5 GO: Human Phenotype - Shared 293T and HEL unique m<sup>6</sup>A-mRNAs

| ID         | Name                       | FDR B&H  | Genes from Input | Genes in Annotation |
|------------|----------------------------|----------|------------------|---------------------|
| HP:0000252 | Microcephaly               | 1.52E-12 | 223              | 766                 |
| HP:0000347 | Micrognathia               | 3.65E-11 | 166              | 536                 |
| HP:0001263 | Global developmental delay | 1.01E-09 | 354              | 1454                |
| HP:0001249 | Intellectual disability    | 4.92E-08 | 317              | 1305                |
| HP:0000431 | Wide nasal bridge          | 1.07E-07 | 118              | 378                 |

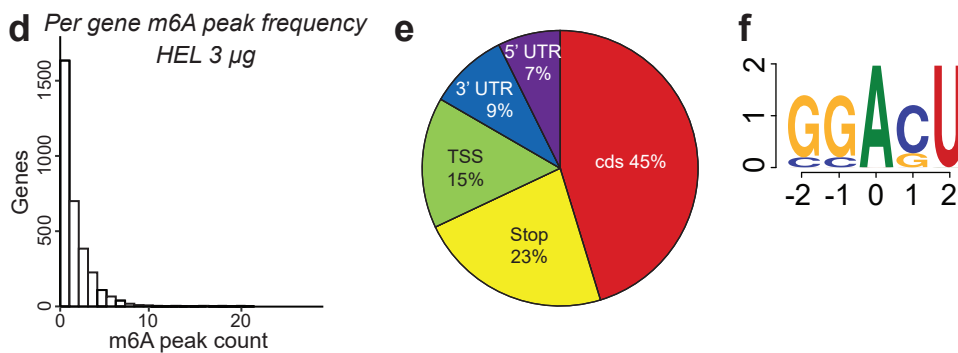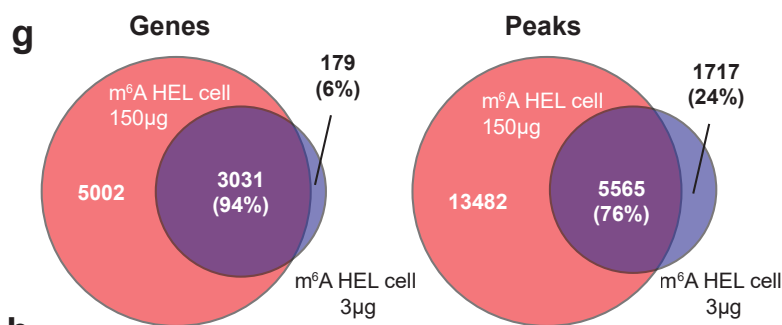

**h**

| Sample | Lineage Marker                             | Unique m6A genes | Total m6A genes | % overlap HEL |
|--------|--------------------------------------------|------------------|-----------------|---------------|
| All    |                                            | 413              | 2060            | 78.1          |
| HSC    | lin-CD38-CD34+                             | 113              | 674             | 81.8          |
| CMP    | CD34+CD38+IL-3Rd <sup>lo</sup> +CD45RA-    | 76               | 815             | 88.1          |
| GMP    | CD34+CD38+IL-3Rd <sup>lo</sup> +CD45RA+    | 55               | 326             | 81            |
| CD14   | FSC <sup>hi</sup> SCC <sup>low</sup> CD14+ | 232              | 928             | 74.1          |
| MEP    | CD34+CD38+IL-3Rd <sup>lo</sup> -CD45RA-    | 37               | 268             | 81.1          |
| MEG    | CD34-CD61+                                 | 87               | 391             | 77.2          |
| ERY1   | CD34+CD71+CD235a-                          | 45               | 869             | 92.3          |
| ERY2   | CD34-CD71+CD235a-                          | 42               | 357             | 84            |
| ERY3   | CD34-CD71+CD235a+                          | 74               | 213             | 63.9          |

## **Supplementary Fig. 2: meRIP-seq in HEL cells and human adult BM cells**

**a**, A histogram of the per gene frequency of m<sup>6</sup>A peaks in methylated genes from HEL meRIP-seq using 150 µg of total RNA (HEL 150 µg). **b**, Venn diagram of m<sup>6</sup>A mRNAs identified by meRIP-seq in 293T cells<sup>2</sup> and in HEL 150 µg cells. **c**, ToppGene GO analysis of m<sup>6</sup>A genes overlapping the HEL 150 µg and 293T<sup>2</sup> data sets. **d**, A histogram of the per gene frequency of m<sup>6</sup>A peaks in methylated genes from HEL 3 µg, showing a similar pattern to HEL 150 µg meRIP-seq data (compare to Supplementary Fig. 2a). **e**, Pie chart displaying the frequency of m<sup>6</sup>A peaks, from HEL 3 µg, within different transcript regions: TSS, centered around translation start ATG, Stop, centered around the stop codon. The distribution is consistent with the HEL 150 µg data (Fig. 2b) **f**, The enriched m<sup>6</sup>A methylation site motif detected by meRIP-seq in HEL cells using 3 µg of total RNA (HEL 3 µg). **g**, Venn diagrams for m<sup>6</sup>A mRNAs and peaks identified by MeRIP-seq in HEL 150 µg and in HEL 3 µg cells, showing significant agreement between the data sets, but clear undersampling in the HEL 3 µg data. **h**, A summary of the surface marker criteria used to isolate hematopoietic populations from adult human BM for meRIP-seq, as well as the total number of m<sup>6</sup>A containing genes identified for each population and the number of unique methylated genes detected in each population. Supplementary Data 2 contains the complete data set.

# Supplementary Fig. 3

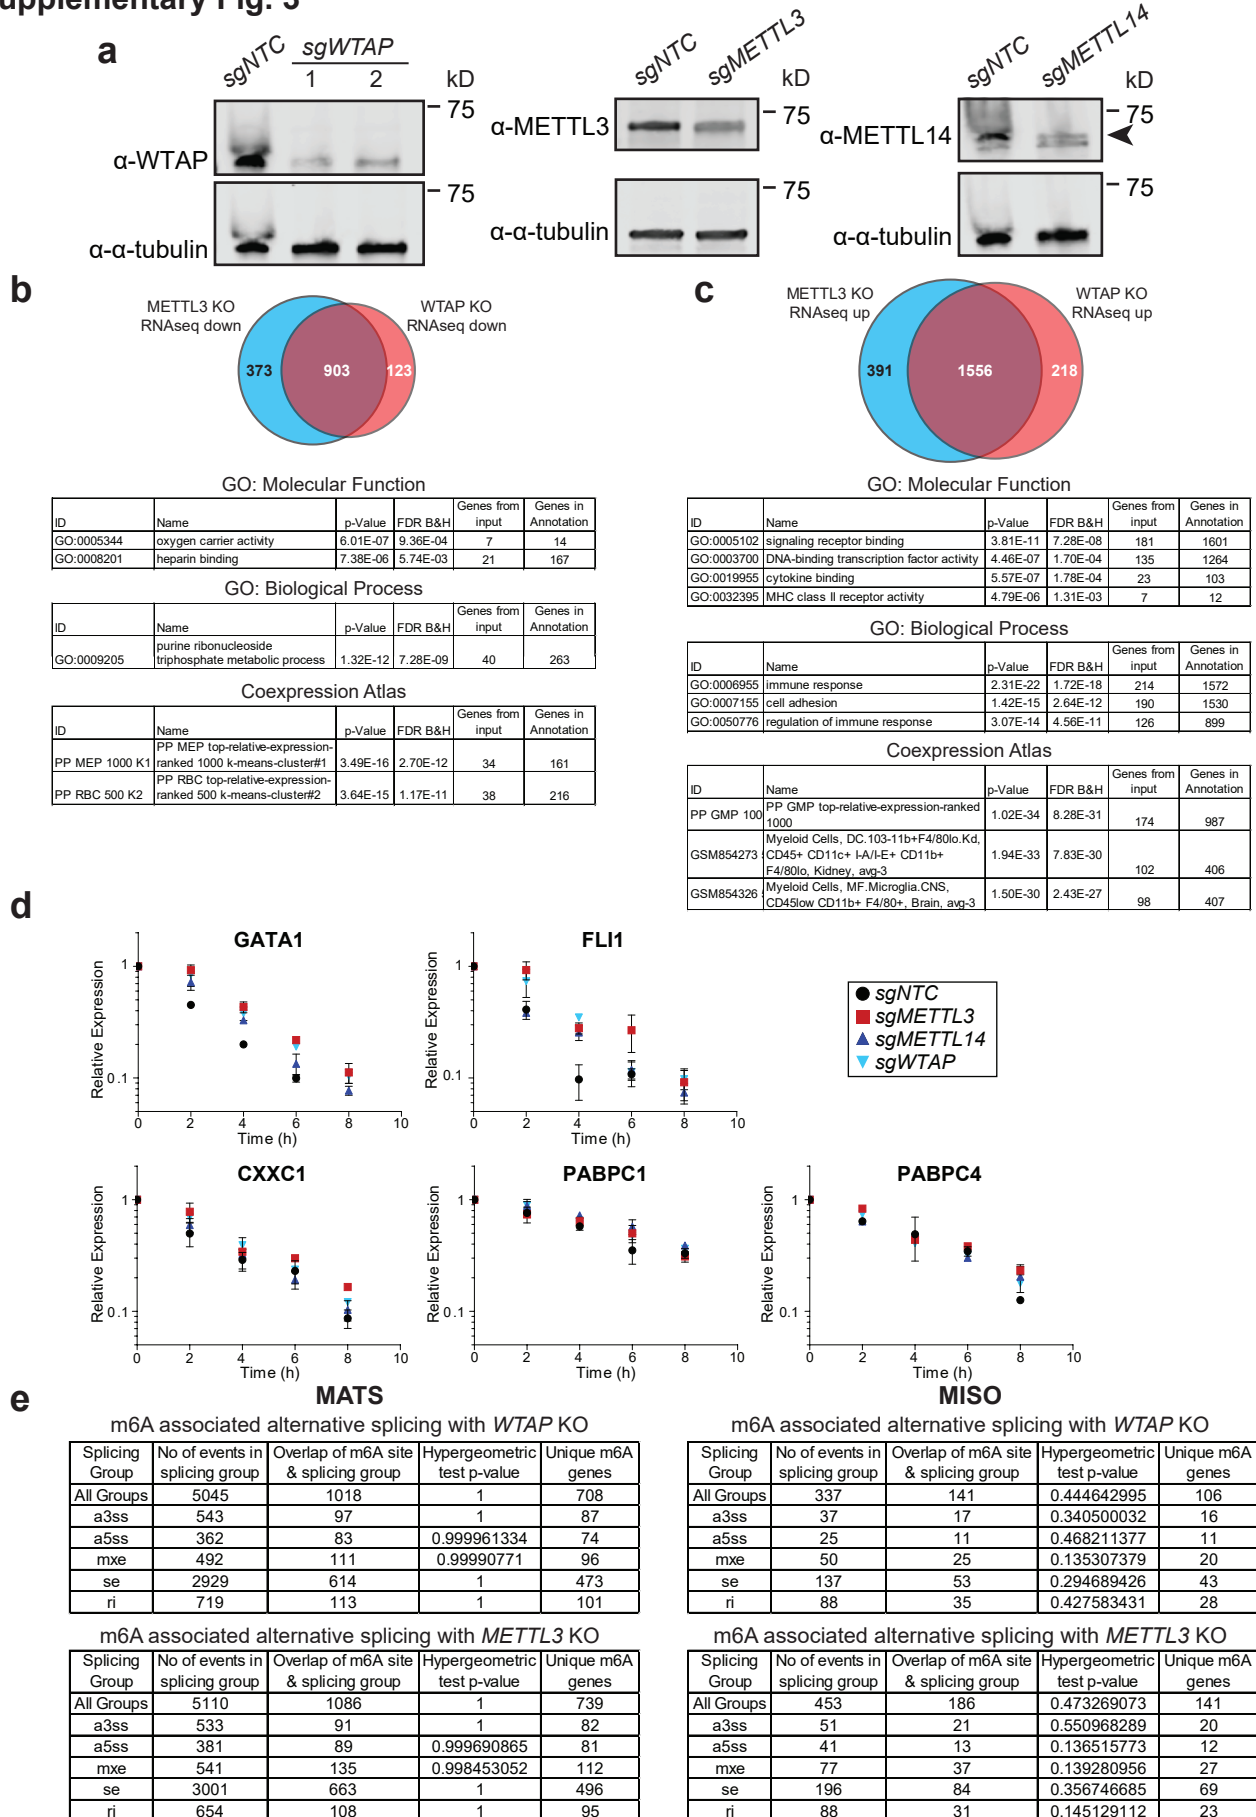

### **Supplementary Fig. 3: *WTAP*-KO in HEL cells disrupts the erythroid**

**transcriptional program but does not affect splicing in cis a**, Western blot validation of

*WTAP*-KO, *METTL3*-KO and *METTL14*-KO in HEL cells by CRISPR-Cas9. Cells were transduced with lentiCRISPRv2 as either single sgRNAs (*WTAP*) or pools of 3 sgRNAs

(*METTL3* and *METTL14*), as described in the Methods. Source data are provided as a Source

Data file. **b**, Venn diagram defining a core profile of up regulated transcripts following *METTL3*-

KO and *WTAP*-KO in HEL cells. Top GO terms for the core transcripts up regulated in HEL cells

following m<sup>6</sup>A loss. Supplementary Data 3 contains the complete results. **c**, Venn diagram

defining a core profile of down regulated transcripts following *METTL3*-KO and *WTAP*-KO in

HEL cells. Top GO terms for the core transcripts down regulated in HEL cells following m<sup>6</sup>A

loss. Supplementary Data 3 contains the complete results. **d**, Actinomycin D mRNA stability

results. Plots of qPCR quantified mRNA levels relative to pre-treatment. None of the genes

showed a significant difference in mRNA half-life between sgNTC and sgKO samples. (mean ±

SEM, Student's t-test) **e**, Summary of splicing analysis of sg*WTAP*-KO and sg*METTL3*-KO HEL

for enrichment in m<sup>6</sup>A genes utilizing MISO and MATS. No significant enrichment was observed

for any splicing event type. Supplementary Data 4 contains the complete data set. (n=4, *WTAP*-

and *METTL3*-KO included splicing events were present in at least 6 pair-wise comparisons for

MISO, Hypergeometric test)

# Supplementary Fig. 4

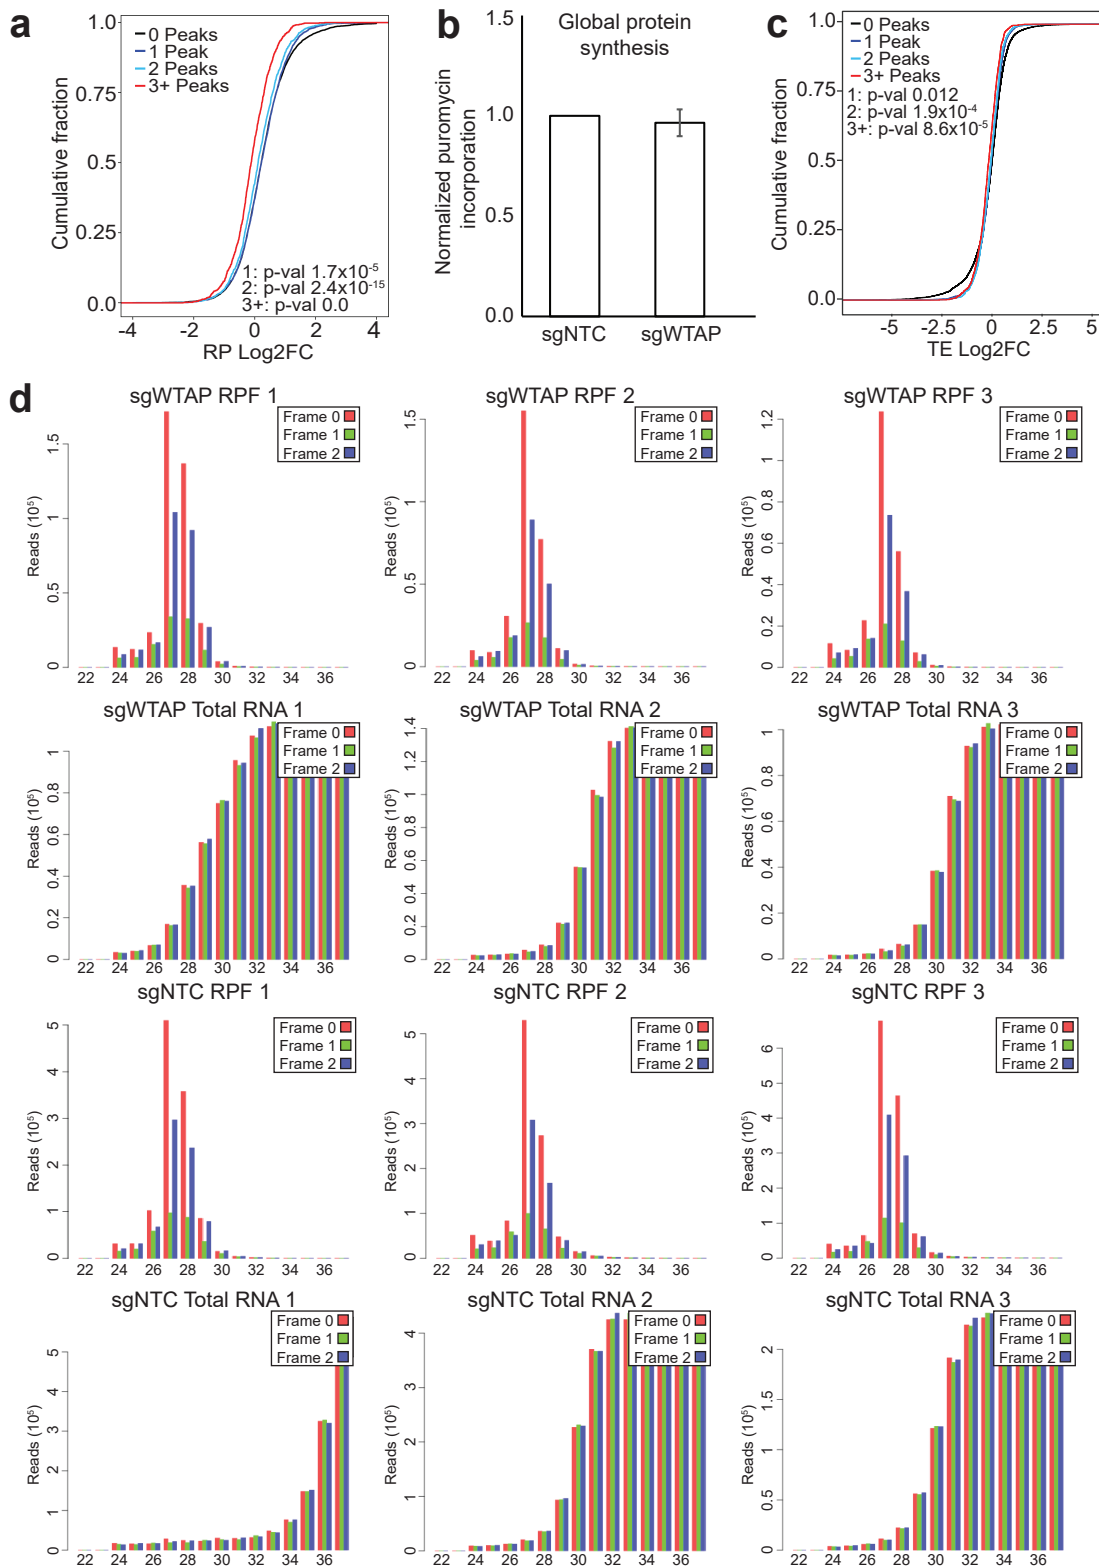



**Supplementary Fig. 4: Translational changes following WTAP-KO** **a**, Cumulative distribution plots, separated based on the number of m<sup>6</sup>A peaks within a transcript, for changes in the frequency of ribosome binding in *sgWTAP-KO* compared to *sgNTC* HEL cells. A leftward-shift indicates reduced translation (n=3, Kolmogorov-Smirnov, 1-peak: P value  $1.7 \times 10^{-5}$ ; 2-peaks: P value  $2.4 \times 10^{-15}$ ; 3+peaks: P value  $< 1.0 \times 10^{-20}$ ). **b**, Global protein synthesis quantified by Western blot for puromycin incorporation in *sgWTAP-KO* HEL cells compared to *sgNTC* HEL cells. No significant change was observed (n=3, s.e., P value = 0.695, t-test). **c**, Cumulative distribution plots, separated based on the number of m<sup>6</sup>A peaks within a transcript, for changes in translational efficiency (TE) in *sgWTAP-KO* HEL cells compared to *sgNTC* HEL cells (n=3, Kolmogorov-Smirnov, 1-peak: p-value 0.012; 2-peaks: p-value  $1.9 \times 10^{-4}$ ; 3+peaks: p-value  $8.6 \times 10^{-5}$ ). **d**, Periodicity plots for *sgWTAP* and *sgNTC* HEL cells ribosome protected fraction (RPF) and RNA input sample replicates.

# Supplementary Fig. 5

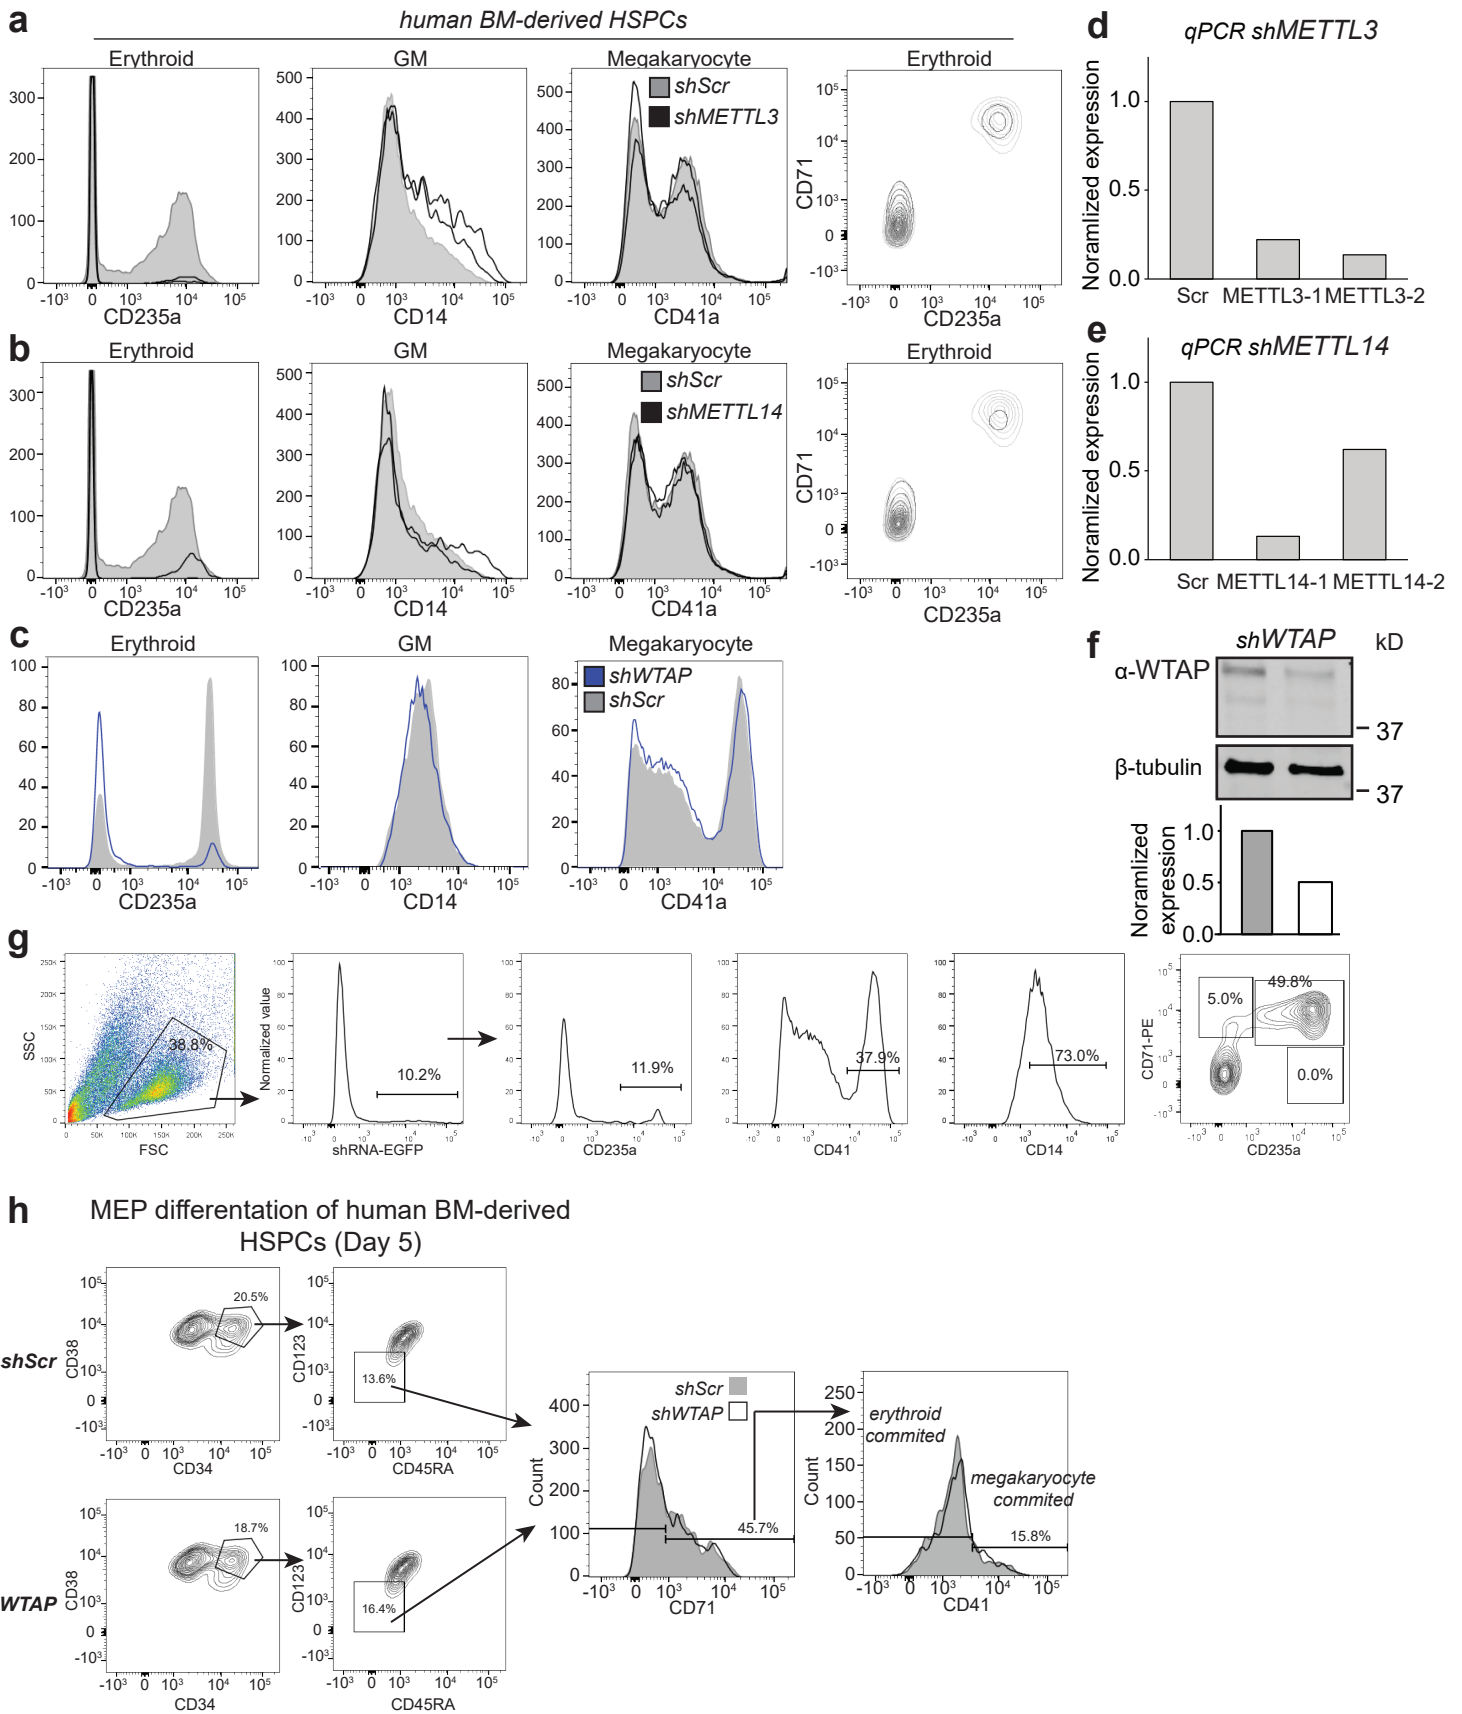

**Supplementary Fig. 5: Characterization of *WTAP*-KD, *METTL3*-KD and *METTL14*-KD in HSPCs** **a**, Flow cytometry of *METTL3*-KD hBM HSPCs differentiated in liquid culture reveals a block to erythropoiesis with no impact on megakaryopoiesis (n=3, 54.9±3.4 vs. 52.5±2.9) and an increase in myelopoiesis (n=3, 52.3±5.0 vs. 37.5±1.8). **b**, Flow cytometry of *METTL14*-KD hBM HSPCs differentiated in liquid culture reveals a block to erythropoiesis with no impact on megakaryopoiesis (n=3, 54.2±0.9 vs. 52.5±2.9) or myelopoiesis (n=3, 37.6±6.3 vs. 37.5±1.8). **c**, Flow cytometry of *WTAP*-KD hBM HSPCs differentiated in liquid culture reveals a block to erythropoiesis with no impact on megakaryopoiesis (n=3, 55.5±4.0 vs. 57.7±6.5) or myelopoiesis (n=3, 93.3±1.5 vs. 89.6±2.6). **d**, Quantification by qPCR of *lv-shMETTL3*-KD in HEL cells for two unique shRNAs. **e**, Quantification by qPCR of *lv-shMETTL14*-KD in HEL cells for two unique shRNAs. **f**, Western blot validation in HEL cells of *lv-shWTAP*-KD. Quantification is normalized to  $\beta$ -actin. Source data are provided as a Source Data file. **g**, Representative gating for Fig. 6a,b. **h**, Representative flow cytometry of the lineage committed progenitors within the MEP population of cultured hBM CD34+ HSPCs transduced with *lv-shWTAP* or *lv-shNTC* and cultured in 4-factor cocktail for 5 days shows no impact of *WTAP*-KD on lineage choice at the MEP stage. Megakaryocyte progenitors are defined as being CD41+ while erythroid progenitors are CD41- (n=3).

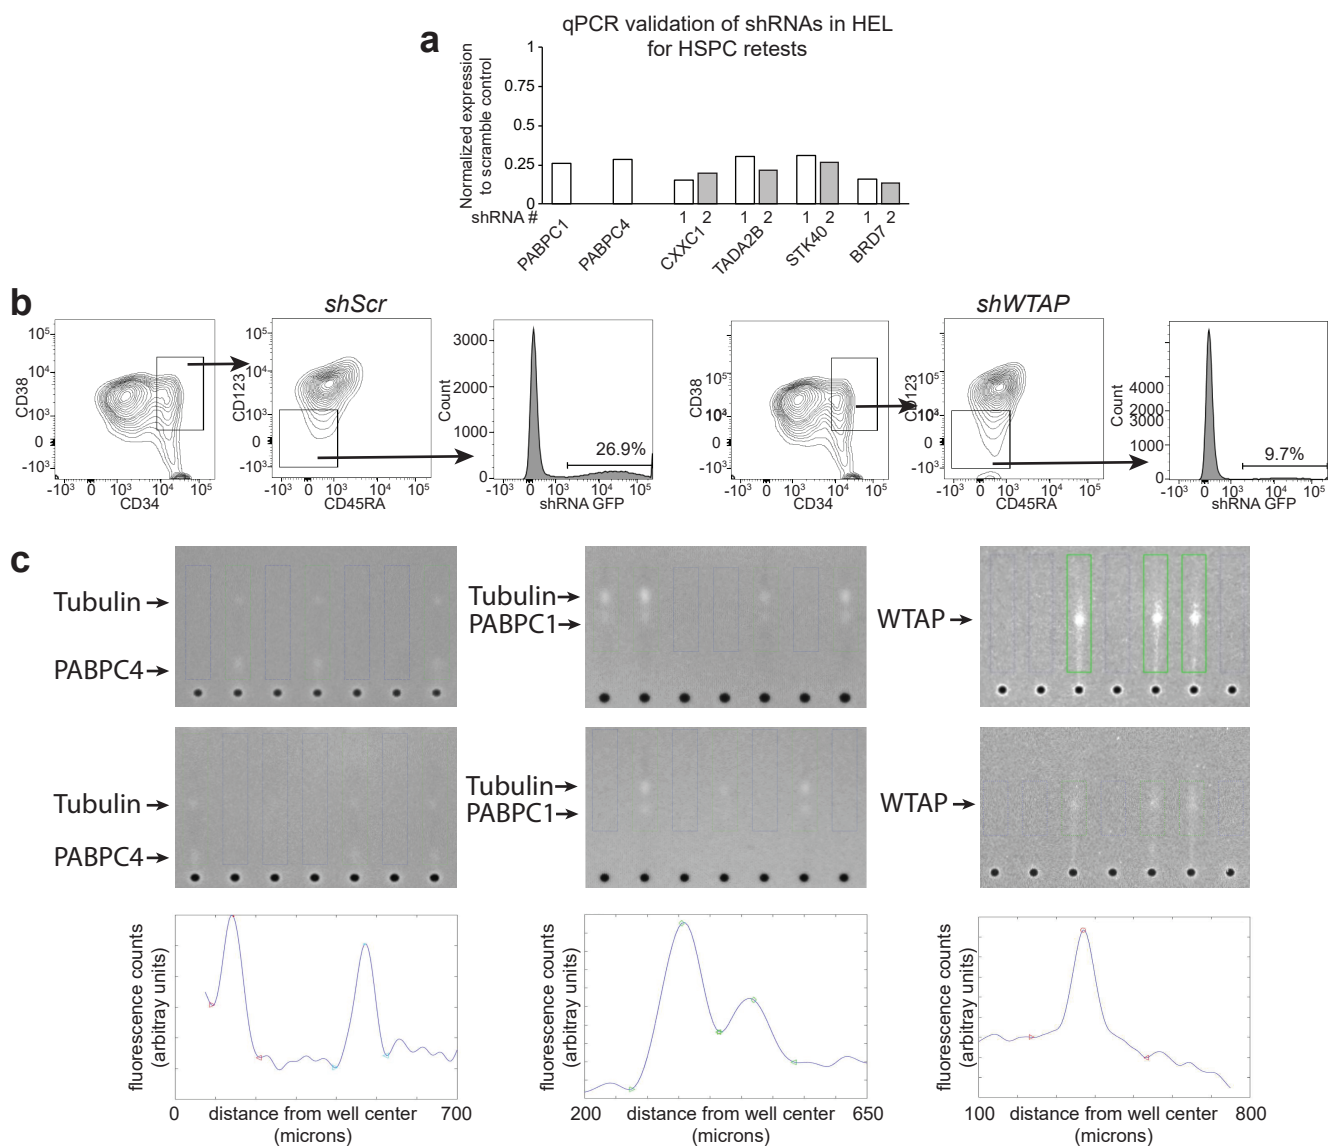

**Supplementary Fig. 6** m<sup>6</sup>A regulation of erythropoiesis. **a**, Quantification by qPCR of lv-shRNA-KD in HEL cells 4 day post-transduction for one or two shRNAs targeting the nonessential m<sup>6</sup>A translational targets retested in Fig. 6e-g. (n=1) **b**, The flow cytometry sorting profile for MEP from shScr or shWTAP transduced hBM CD34<sup>+</sup> HSPCs cultured for 5 days and used for single cell Western blot (scWB) analysis in Fig. 6g. **c**, Representative lanes and signal intensities on the scWB chip for WTAP, PABPC1, PABPC4 and  $\alpha$ -Tubulin. Plots for representative peak calling using the Scout software are shown.

## Supplementary References

1. Yu, M. *et al.* Insights into GATA-1-mediated gene activation versus repression via genome-wide chromatin occupancy analysis. *Molecular cell* **36**, 682-695 (2009).
2. Meyer, K.D. *et al.* Comprehensive analysis of mRNA methylation reveals enrichment in 3' UTRs and near stop codons. *Cell* **149**, 1635-1646 (2012).
